# Supplementary material for: Construction of flower-like ZnSnO3/Zn2SnO4 hybrids for enhanced phenylamine sensing performance
Source: Royal Society of Chemistry journal article supplement (doi:10.1039/c9qi00586b), 2019-01-01
Supplement: c9qi00586b1.pdf [file c9qi00586b1.pdf]

**Supplementary content**

**Construction of flower-like  $\text{ZnSnO}_3/\text{Zn}_2\text{SnO}_4$  hybrids for enhanced phenylamine sensing performance**

Liyong Du, Hongpeng Zhang, Mingming Zhu, Mingzhe Zhang \*

State Key Laboratory of Superhard Materials, Jilin University, Changchun 130012,  
P.R. China.

\* Corresponding author. Email address: zhangmz@jlu.edu.cn

**Synthesis of ZnSnO<sub>3</sub> nanosheets:** ZnSnO<sub>3</sub> nanosheets were synthesized based on literature with a few modification [1]. Typically, 0.002 mol Na<sub>2</sub>SnO<sub>3</sub>·4H<sub>2</sub>O and 0.002 mol Zn(CH<sub>3</sub>COO)<sub>2</sub>·2H<sub>2</sub>O were dissolved in 20 ml of mixed solutions (5 ml ethanol and 15 ml DI water), respectively. Then Na<sub>2</sub>SnO<sub>3</sub> solution was slowly dropped into the Zn(CH<sub>3</sub>COO)<sub>2</sub> solution under vigorous stirring for 15 min. Next, the above solution was transferred into Teflon-lined autoclave and kept at 180°C at 12 h. After cooled to room temperature, the precipitate was collected by centrifugation and washed by DI water and ethanol several times, then dried for a night. Finally, the sample was annealed at 500°C for 4 h.

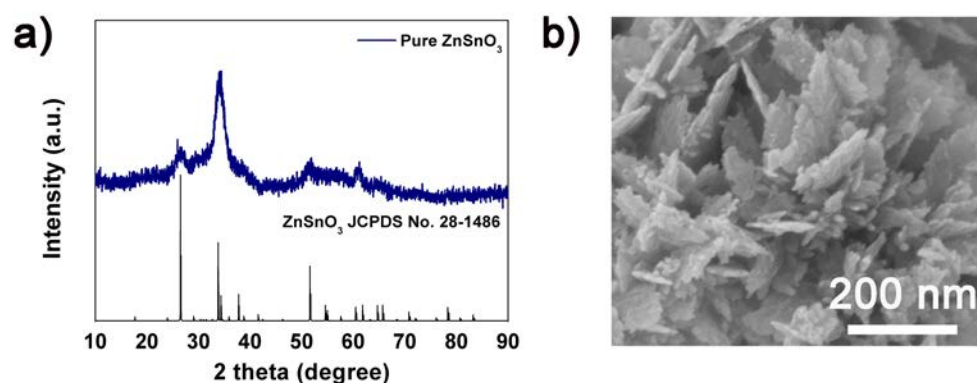

**Fig. S1** (a, b) XRD pattern and SEM image of pure ZnSnO<sub>3</sub> nanosheets, respectively.

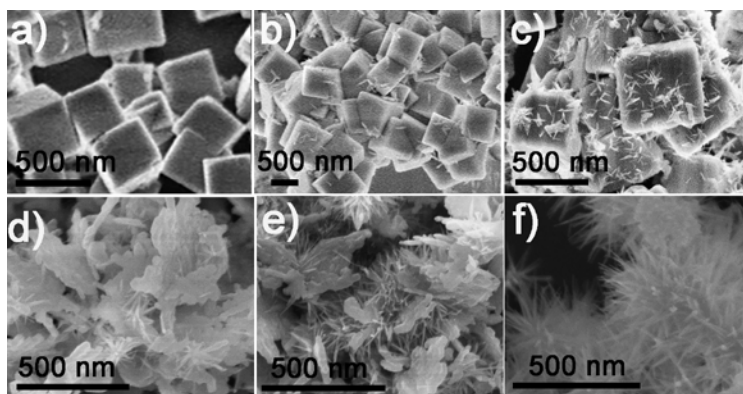

**Fig. S2** SEM images of the as-obtained  $\text{ZnSn}(\text{OH})_6$  cubes at hydrothermal reactions of (a) 0 h, (b) 6 h, (c) 10 h, (d) 18 h, (e) 20 h and (f) 24 h.

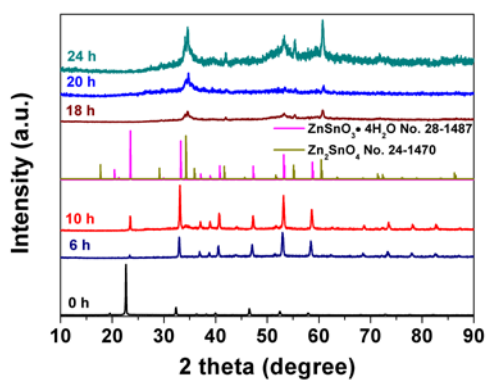

**Fig. S3** XRD pattern of precursors at different reaction time

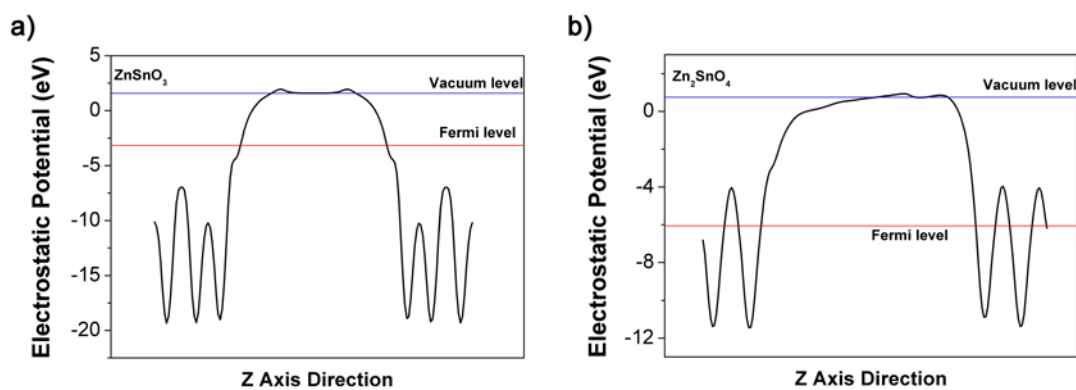

**Fig. S4.** Electrostatic potentials for the (a)  $\text{ZnSnO}_3$  and (b)  $\text{Zn}_2\text{SnO}_4$ .

## References

- [1] Y. J. Chen, B. H. Qu, L. Mei, D. N. Lei, L. B. Chen, Q. H. Li, T. H. Wang, Synthesis of  $\text{ZnSnO}_3$  mesocrystals from regular cube-like to sheet-like structures and their comparative electrochemical properties in Li-ion batteries†, *J. Mater. Chem.* 22 (2012) 25373-25379.
